# Supplementary material for: Vessel graft fabricated by the on-site differentiation of human mesenchymal stem cells towards vascular cells on vascular extracellular matrix scaffold under mechanical stimulation in a rotary bioreactor
Source: Royal Society of Chemistry journal article supplement (doi:10.1039/c8tb03348j), 2019-01-01
Supplement: c8tb03348j1.pdf [file c8tb03348j1.pdf]

### **Supplementary information**

#### **Vessel Graft Fabricated by the On-site Differentiation of Human Mesenchymal Stem Cells Toward Vascular Cells on Vascular Extracellular Matrix Scaffold under Mechanical Stimulations in A Rotary Bioreactor**

Na Li<sup>1,2</sup>, Alex P. Rickel<sup>1,2</sup>, Hanna J. Sanyour<sup>1,2</sup>, Zhongkui Hong<sup>1,2\*</sup>

<sup>1</sup>Department of Biomedical Engineering, University of South Dakota, 4800 N Career Ave, Sioux Falls, SD, USA

<sup>2</sup>BioSNTR, Sioux Falls, SD, USA

\*To whom correspondence should be addressed:

Zhongkui Hong, Ph.D.,

Biomedical Engineering Department,

University of South Dakota,

4800 N Career Ave, Suite 221, Sioux Falls, SD 57107

Fax: (605) 782-3280

Tel: (605) 275-7468

E-mail: [Zhongkui.Hong@usd.edu](mailto:Zhongkui.Hong@usd.edu)

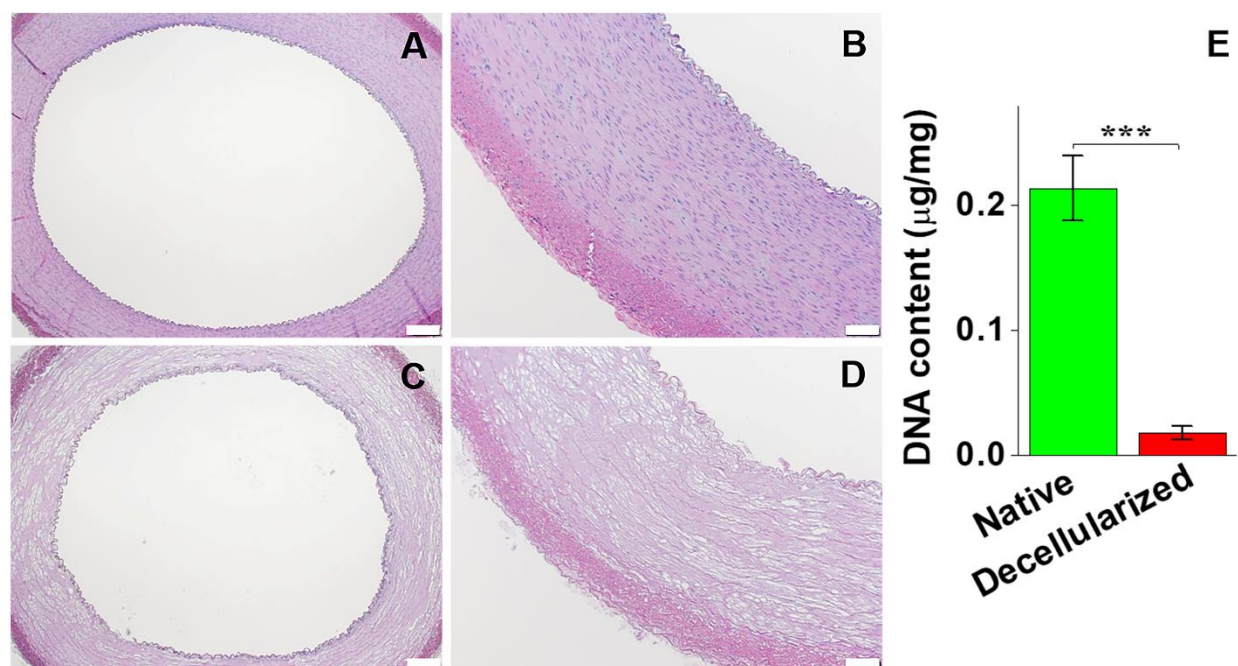

**Fig. S1** Characterization of the decellularized carotid artery ECM scaffolds. HE staining of native carotid (A, B) and decellularized ECM (C, D) supported the complete removal of nucleic components (blue-purple) by decellularization treatment. DNA quantification analysis showed that the remaining DNA content in the decellularized scaffolds was significantly lower than that in native carotid (E). Data are expressed as mean  $\pm$  SD ( $n = 3$ ). \*\*\* $P < 0.001$ .

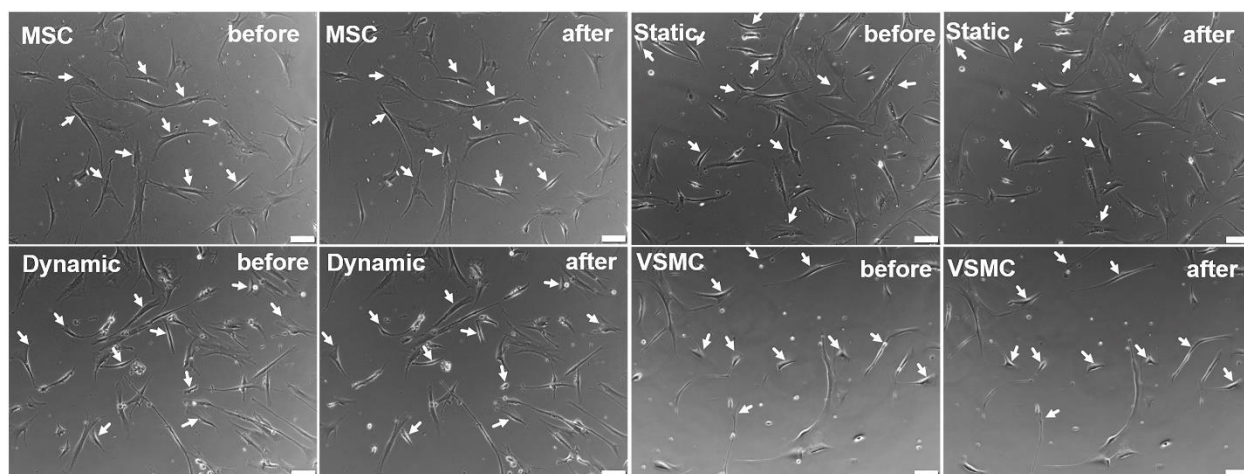

**Fig. S2** Contractile response of four groups of cells to 50 mM KCl. The images represented the

cells before and after KCl treatment for 15 min. Arrows indicate the cells used for the quantification of the cell area reduction. Scale bars = 100  $\mu$ m.

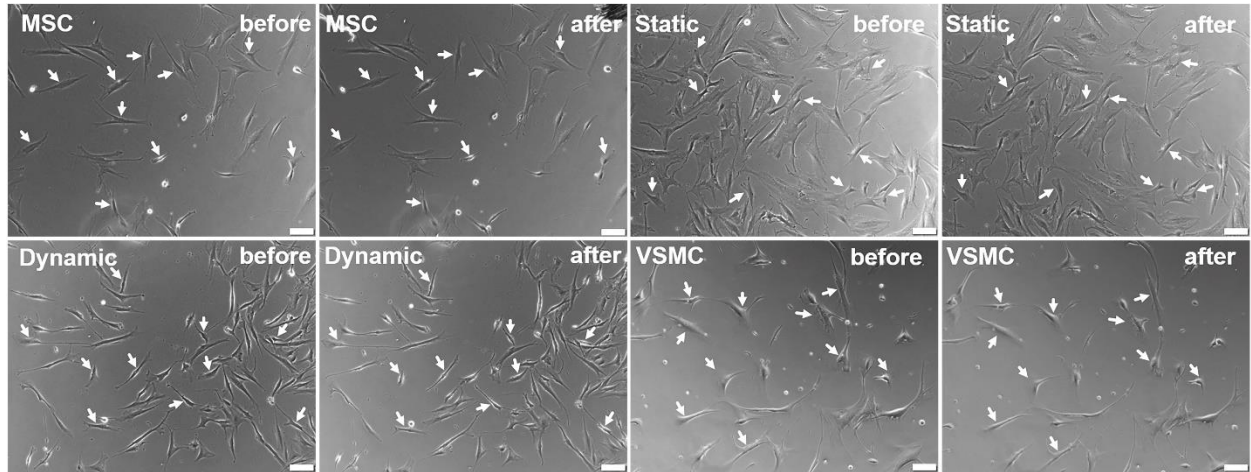

**Fig. S3** Contractile response of four groups of cells to 1 mM carbachol. The images represented the cells before and after carbachol treatment for 15 min. Arrows indicate the cells used for the quantification of the cell area reduction. Scale bars = 100  $\mu$ m.
